# Supplementary material
Source: Research Square preprint supplement (doi:10.21203/rs.3.rs-8930088/v1)
Supplement: Supplementary file 1 [file b175533a2f12f7816c9a9e93.xlsx]

## Sheet: Supp Table 1
Table S1: List of annotators used with their version and tags from OpenCRAVAT
Annotator	version used	variant effect prediction	cancer	non coding	genes	clinical relevance	variants	evolution	allele frequency	literature	functional studies	visualization
ALoFT	1.1.0	x					x
BioGRID	3.8.0				x
CADD	1.0.1	x
CADD Exome	1.6.1	x
Cancer Gene Census	85.0.12		x		x
Cancer Genome Interpreter	1.3.0		x			x
Candidate cis-Regulatory Elements by ENCODE (SCREEN)	1.0.1			x
CGD: Clinical Genomic Database	1.3.0				x
CHASMplus	1.3.0	x	x
CIViC	2023.04.01		x			x	x			x
ClinGen Gene	1.1.1				x	x
ClinPred	1.0.0	x				x	x
ClinVar	2023.02.01					x	x			x
COSMIC	94.0.0				x		x
COSMIC Gene	94.0.0		x		x
CScape	1.0.1	x	x	x
DANN	1.0.2	x
DANN Coding	1.0.0	x
dbscSNV	1.1.0	x
dbSNP	154.0.2						x			x
DGIdb: The Drug Interaction Database	1.0.0				x	x
Ensembl Regulatory Build	1.0.3			x
Essential Genes	3.5.8				x
ExAC Gene and CNV	0.4.0				x
FATHMM	2.3.7	x
FATHMM XF Coding	1.0.0	x		x
FunSeq2	1.0.1		x	x			x
Gene Ontology	2022.02.01				x
GeneHancer	1.1.0			x
GERP++	3.6.2						x	x
GHIS	3.6.0				x
gnomAD	2.2.0								x
gnomAD Gene	2.2.1				x
gnomAD3	1.1.0								x
GTEx eQTLs	7.0.4						x
GWAS Catalog	1.0.0			x		x	x			x
Likelihood Ratio Test	1.0.0	x
LINSIGHT	2021.01.08			x			x	x
LoFtool	3.6.1				x
MaveDB	1.0.1										x
MetaLR	1.0.3	x
MetaSVM	1.0.1	x
Mutation Assessor	3.1.0	x
MutationTaster	1.0.0	x
MutPred	1.4.0	x
MutPred-Indel	1.1.0	x
NCBI Gene	2022.08.30				x					x
NDEx Congenital Heart Disease	1.0.2		x		x		x
NDEx NCI Cancer Pathways	1.0.0				x							x
NDEx SIGNOR	1.0.2		x		x		x
OMIM	1.0.0					x	x
p(HI)	3.6.1				x
P(rec)	3.6.0				x
PangaloDB	1.0.0				x
Phast Cons	3.5.9						x	x
PhD-SNPg	0.0.9	x
PhyloP	3.5.10						x	x
PolyPhen-2	2022.10.13	x
PROVEAN: Protein Variant Effect Analyzer	1.1.0	x
Repeat Sequences	2020.10.16			x
REVEL	2022.11.29	x
RVIS	3.1.0				x
Segway	1.2.1			x			x
SIFT	1.2.0	x
SiPhy	3.5.5						x	x
SpliceAI	1.0.0	x
UniProt	2020.08.10									x
VARITY_R	1.0.0	x					x
VEST4	4.4.0	x					x

## Sheet: Supp Table 2
Table S2: Number of variants in Training and Testing datasets divided by high and low impact by consequence class
Consequence	Train		Validation		Test
	high_impact	low_impact	high_impact	low_impact	high_impact	low_impact
3 prime UTR	285	2815	89	690	1048	13981
5 prime UTR	105	1035	23	251	239	3229
complex substitution	46	18	13	2	92	13
exon loss variant	6	NA	2	NA	22	NA
frameshift elongation	3615	31	942	4	8097	157
frameshift truncation	8208	26	1988	14	17127	246
inframe deletion	300	351	66	76	199	273
inframe insertion	52	227	10	49	41	87
intergenic	543	2113	138	509	714	19490
intron	2522	25468	637	6400	2467	114497
missense	9900	15950	2395	3951	5684	19809
other	72	53	19	14	124	638
other RNA	338	843	70	217	3217	60763
splice site	4695	41	1228	9	6913	157
start lost	200	11	65	2	202	20
start retained	NA	1	NA	1	NA	1
stop gained	9270	45	2354	12	9716	300
stop lost	12	4	4	NA	31	31
stop retained	NA	23	NA	7	NA	41
synonymous	149	58735	37	14739	82	70719
Total	40318	107790	10080	26947	56015	304452

## Sheet: Supp Table 3
Table S3: Actual consequences of variants annotated with consequence category
Actual consequence	Consequence category
NMD_transcript_variant,synonymous_variant	synonymous
synonymous_variant	synonymous
2kb_downstream_variant,NMD_transcript_variant	intergenic
frameshift_elongation	frameshift elongation
processed_transcript	other RNA
stop_gained	stop gained
2kb_downstream_variant,miRNA	other RNA
2kb_downstream_variant,lnc_RNA	other RNA
intron_variant	intron
intron_variant,processed_transcript	intron
missense_variant	missense
frameshift_truncation	frameshift truncation
NMD_transcript_variant,3_prime_UTR_variant	3 prime UTR
3_prime_UTR_variant	3 prime UTR
5_prime_UTR_variant	5 prime UTR
2kb_downstream_variant,processed_transcript	other RNA
intron_variant,splice_site_variant	splice site
intron_variant,lnc_RNA	other RNA
2kb_upstream_variant,lnc_RNA	other RNA
2kb_upstream_variant	intergenic
2kb_upstream_variant,processed_transcript	other RNA
intron_variant,NMD_transcript_variant	intron
lnc_RNA	other RNA
NMD_transcript_variant,stop_gained	stop gained
missense_variant,NMD_transcript_variant	missense
2kb_downstream_variant,NSD_transcript	intergenic
2kb_downstream_variant	intergenic
complex_substitution,missense_variant	missense
complex_substitution,frameshift_truncation	frameshift truncation
complex_substitution,frameshift_truncation,NMD_transcript_variant	frameshift truncation
intron_variant,NMD_transcript_variant,splice_site_variant	splice site
2kb_upstream_variant,NMD_transcript_variant	intergenic
2kb_upstream_variant,misc_RNA	other RNA
complex_substitution,frameshift_elongation,intron_variant	frameshift elongation
2kb_downstream_variant,misc_RNA	other RNA
missense_variant,start_lost	start lost
NSD_transcript	other
NMD_transcript_variant,5_prime_UTR_variant	5 prime UTR
splice_site_variant	splice site
stop_retained_variant	stop retained
2kb_upstream_variant,miRNA	other RNA
inframe_insertion	inframe insertion
frameshift_truncation,NMD_transcript_variant	frameshift truncation
frameshift_elongation,NMD_transcript_variant	frameshift elongation
frameshift_truncation,stop_gained	frameshift truncation
inframe_deletion	inframe deletion
2kb_downstream_variant,snRNA	other RNA
2kb_upstream_variant,NSD_transcript	intergenic
inframe_deletion,NMD_transcript_variant	inframe deletion
frameshift_truncation,NMD_transcript_variant,stop_gained	frameshift truncation
missense_variant,start_lost,NMD_transcript_variant	start lost
2kb_upstream_variant,snRNA	other RNA
intron_variant,NSD_transcript	intron
frameshift_elongation,stop_gained	frameshift elongation
NMD_transcript_variant,splice_site_variant	splice site
frameshift_truncation,stop_lost	frameshift truncation
2kb_downstream_variant,snoRNA	other RNA
inframe_insertion,stop_gained	stop gained
ribozyme	other RNA
NSD_transcript,5_prime_UTR_variant	5 prime UTR
complex_substitution,frameshift_elongation	frameshift elongation
polymorphic_pseudogene,5_prime_UTR_variant	other RNA
polymorphic_pseudogene	other RNA
NMD_transcript_variant	other
frameshift_truncation,stop_lost,stop_retained_variant,3_prime_UTR_variant	frameshift truncation
2kb_downstream_variant,stop_lost	stop lost
complex_substitution,inframe_deletion	inframe deletion
complex_substitution	complex substitution
NMD_transcript_variant,stop_lost	stop lost
inframe_insertion,NMD_transcript_variant	inframe insertion
2kb_upstream_variant,ribozyme	other RNA
frameshift_elongation,NMD_transcript_variant,stop_gained	frameshift elongation
complex_substitution,stop_gained	stop gained
exon_loss_variant,frameshift_truncation	frameshift truncation
2kb_downstream_variant,stop_lost,3_prime_UTR_variant	stop lost
inframe_deletion,stop_gained	stop gained
polymorphic_pseudogene,3_prime_UTR_variant	other RNA
complex_substitution,missense_variant,NMD_transcript_variant	missense
snRNA	other RNA
2kb_upstream_variant,snoRNA	other RNA
exon_loss_variant,frameshift_truncation,NMD_transcript_variant	frameshift truncation
miRNA	other RNA
complex_substitution,inframe_insertion,intron_variant	complex substitution
stop_lost	stop lost
complex_substitution,frameshift_elongation,NMD_transcript_variant	frameshift elongation
exon_loss_variant,inframe_deletion	exon loss variant
frameshift_truncation,start_lost	frameshift truncation
complex_substitution,inframe_insertion,stop_gained	stop gained
misc_RNA	other RNA
NMD_transcript_variant,stop_retained_variant	stop retained
start_lost,5_prime_UTR_variant	start lost
complex_substitution,inframe_insertion,intron_variant,missense_variant	complex substitution
complex_substitution,frameshift_elongation,intron_variant,NMD_transcript_variant	frameshift elongation
complex_substitution,inframe_insertion,intron_variant,NMD_transcript_variant	complex substitution
intron_variant,polymorphic_pseudogene	other RNA
2kb_downstream_variant,intron_variant,stop_lost,3_prime_UTR_variant	stop lost
complex_substitution,inframe_insertion	complex substitution
start_retained_variant	start retained
2kb_upstream_variant,rRNA	other RNA
complex_substitution,inframe_deletion,missense_variant	complex substitution
snoRNA	other RNA
inframe_insertion,NMD_transcript_variant,stop_gained	stop gained
complex_substitution,synonymous_variant	complex substitution
NMD_transcript_variant,stop_lost,3_prime_UTR_variant	stop lost
frameshift_elongation,stop_lost	frameshift elongation

## Sheet: Supp Table 4
Table S4: Variant count across variant consequence class and per chromosome
chrom	3 prime UTR	5 prime UTR	complex substitution	exon loss variant	frameshift elongation	frameshift truncation	inframe deletion	inframe insertion	intergenic	intron	missense	other	other RNA	splice site	start lost	start retained	stop gained	stop lost	stop retained	synonymous	Total	Total chromosome length (bp)
chr1	1089	264	6		523	1160	30	13	1186	9832	2355	111	6771	578	28		870	3	4	6261	31084	248956422
chr2	1051	298	11	3	957	1870	31	7	1255	11686	2070	31	7838	721	13	1	1020	2	6	6747	35618	242193529
chr3	1068	153	6		425	792	21	6	1216	6387	1392	28	2802	394	11		481	3	2	3527	18714	198295559
chr4	846	135	1		227	521	9	1	417	4260	691	11	1821	222	6		334	1	2	2709	12214	190214555
chr5	1170	177	5	1	491	1091	15	4	828	5472	1283	8	2501	334	9		578	2	1	3129	17099	181538259
chr6	465	187	3		378	880	27	6	1159	4978	1203	11	2043	391	9		642	1	1	3633	16017	170805979
chr7	747	128	9		353	749	15	5	959	5551	1879	28	2617	358	11		461	5	3	4083	17961	159345973
chr8	789	130			251	564	13	4	751	4049	767	10	2087	276	3		376			2714	12784	145138636
chr9	481	170	5	1	289	611	10	4	815	5650	959	4	3319	318	12		390		3	2844	15885	138394717
chr10	358	123	11		323	646	21	6	428	4986	734	5	1903	287	8		368	1		2458	12666	133797422
chr11	752	241	12	2	525	1216	20	7	1537	7523	1289	22	4058	449	11		724	6	3	3138	21535	135086622
chr12	796	141	4		289	644	22	15	731	4259	1329	35	2535	284	10		379	5	4	2865	14347	133275309
chr13	180	120	1		321	688	8	2	105	2054	491	9	1089	146	4		268		2	1401	6889	114364328
chr14	437	116	2		176	395	13	3	527	3600	727	54	1902	155	4		242	1	2	2550	10906	107043718
chr15	572	90	4	2	388	697	16	4	742	4795	878	125	2275	360	5		396	6	1	2752	14108	101991189
chr16	852	147	5	6	512	1035	39	13	1541	5721	1063	19	2960	333	14		483	4	1	4094	18842	90338345
chr17	980	252	9	3	708	1422	69	10	1929	6634	1386	72	3499	406	13		519	5	4	3984	21904	83257441
chr18	257	57	2		106	251	2		193	2133	342	5	1670	120	2		164	1		1137	6442	80373285
chr19	693	198			252	509	31	8	1785	5896	1678	61	2858	291	9		328	4	1	4586	19188	58617616
chr20	250	67	1	1	110	231	7	1	704	2416	500	43	1455	119	7		163	1		1202	7278	64444167
chr21	146	7	2	1	102	203	4	1	132	1586	270	6	1453	89	4		137			602	4745	46709983
chr22	365	53	3	2	157	408	9	1	529	2270	495	23	1559	163	8		232	3	1	1504	7785	50818468
chrX	685	213	3		390	789	40	7	735	5225	1703	34	2960	276	21		459	8		2879	16427	156040895
chrY		1			1	1				1	9	2	5				2			2	24	57227415
chrM												5									5
Total	15029	3468	105	22	8254	17373	472	128	20204	116964	25493	757	63980	7070	222	1	10016	62	41	70801	360462

## Sheet: Supp Table 5
Table S5: F1 scores overall by chromosome, by consequence class and across variant consequences and per chromosome
								overall by chromosome
	chr1	chr2	chr3	chr4	chr5	chr6	chr7	chr8	chr9	chr10	chr11	chr12	chr13	chr14	chr15	chr16	chr17	chr18	chr19	chr20	chr21	chr22	chrX
DITTO	0.93	0.95	0.94	0.94	0.93	0.94	0.89	0.94	0.94	0.94	0.94	0.93	0.96	0.93	0.96	0.94	0.94	0.95	0.92	0.93	0.93	0.95	0.89
CADD	0.58	0.15	0.55	0.57	0.51	0.57	0.55	0.6	0.56	0.53	0.54	0.53	0.45	0.59	0.56	0.48	0.47	0.61	0.55	0.57	0.53	0.56	0.56
ClinPred	0.28	0.21	0.3	0.22	0.16	0.18	0.24	0.19	0.21	0.18	0.24	0.3	0.18	0.27	0.21	0.18	0.21	0.21	0.28	0.3	0.23	0.19	0.42
MetaSVM	0.23	0.18	0.24	0.13	0.12	0.12	0.23	0.1	0.14	0.14	0.18	0.24	0.16	0.2	0.19	0.14	0.18	0.17	0.23	0.28	0.19	0.12	0.36
GERP	0.24	0.29	0.27	0.24	0.3	0.3	0.25	0.25	0.24	0.27	0.3	0.27	0.4	0.22	0.29	0.28	0.32	0.23	0.19	0.22	0.25	0.28	0.31
spliceai	0.27	0.25	0.28	0.28	0.23	0.28	0.29	0.31	0.31	0.29	0.26	0.27	0.39	0.27	0.31	0.24	0.22	0.31	0.3	0.31	0.29	0.27	0.21
Revel	0.19	0.12	0.2	0.1	0.08	0.11	0.13	0.07	0.09	0.11	0.14	0.2	0.13	0.14	0.14	0.08	0.1	0.07	0.15	0.18	0.14	0.1	0.23
Alphamissense	0.21	0.18	0.25	0.14	0.13	0.13	0.22	0.12	0.16	0.15	0.18	0.26	0.16	0.2	0.19	0.14	0.16	0.16	0.24	0.27	0.18	0.08	0.36
								overall by variant consequences
	missense	stop lost	stop gained	start lost	synonymous	splice site	frameshift truncation	frameshift elongation	complex substitution	exon loss variant	inframe insertion	inframe deletion	intron	3 prime UTR	5 prime UTR	other RNA	intergenic	other
DITTO	0.82	0.85	0.99	0.98	0.52	0.99	0.99	0.99	0.93	0.95	0.67	0.72	0.68	0.87	0.74	0.83	0.77	0.94
CADD	0.71	0.53	0.94	0.97	0.31	0.99	0.99	0.98	0.93	0	0	0.59	0.69	0.74	0.53	0.46	0.69	0.7
ClinPred	0.79	0	0.99	0.97	0.15	0.99	0	0	0	0	0	0	0.22	0.46	0.27	0.4	0.36	0.5
MetaSVM	0	0	0	0	0	0	0	0	0	0	0	0	0	0	0	0	0	0
GERP	0	0	0	0	0	0	0	0	0	0	0	0	0	0	0	0	0	0
spliceai	0.06	0.67	0.06	0.01	0.39	0.98	0	0	0	0	0	0	0.56	0.07	0.11	0.31	0.44	0.08
Revel	0.75	0	0	0.86	0	0	0	0	0	0	0	0	0	0.01	0	0	0	0
Alphamissense	0.8	0	0	0.02	0.16	0	0	0	0	0	0	0	0.17	0.37	0.2	0.34	0.27	0.41
											intergenic
	chr1	chr2	chr3	chr4	chr5	chr6	chr7	chr8	chr9	chr10	chr11	chr12	chr13	chr14	chr15	chr16	chr17	chr18	chr19	chr20	chr21	chr22	chrX
DITTO	0.63	0.68	0.82	0.74	0.72	0.72	0.7	0.78	0.86	0.86	0.76	0.81	0.5	0.79	0.69	0.82	0.84	0.95	0.85	0.8	1	0.85	0.59
CADD	0.68	0.6	0.75	0.8	0.62	0.74	0.59	0.85	0.58	0.3	0.83	0.73	0.37	0.67	0.92	0.77	0.76	0.64	0.64	0.8	0.5	0.86	0.84
ClinPred	0.26	0.34	0.27	0.62	0.26	0.22	0.2	0.21	0.29	0.44	0.56	0.44	0	0.23	0.42	0.49	0.26	0.67	0.24	0.27	0	0.17	0.79
MetaSVM	0.26	0.24	0.11	0.4	0.27	0.09	0.26	0.15	0.27	0.25	0.46	0.26	0.25	0.16	0.47	0.43	0.22	0.71	0.13	0.12	0	0.13	0.63
GERP	0.05	0.04	0.08	0.05	0.03	0.07	0.07	0.06	0.1	0.02	0.07	0.06	0.08	0.08	0.03	0.05	0.1	0.09	0.08	0.03	0.44	0.09	0.12
spliceai	0.49	0.42	0.46	0.33	0.57	0.54	0.07	0.52	0.24	0.44	0.45	0.5	0	0.48	0.64	0.45	0.47	0.08	0.3	0.44	0.5	0.53	0.16
Revel	0	0	0	0	0	0	0	0	0	0	0	0	0	0	0	0	0	0	0	0	0	0	0
Alphamissense	0.16	0.23	0.15	0.43	0.26	0.04	0.23	0.13	0.12	0.36	0.44	0.27	0	0.23	0.13	0.36	0.21	0.71	0.16	0.15	0	0.19	0.75
											intron
	chr1	chr2	chr3	chr4	chr5	chr6	chr7	chr8	chr9	chr10	chr11	chr12	chr13	chr14	chr15	chr16	chr17	chr18	chr19	chr20	chr21	chr22	chrX
DITTO	0.6	0.7	0.71	0.62	0.64	0.73	0.73	0.65	0.76	0.74	0.67	0.62	0.69	0.54	0.76	0.65	0.67	0.7	0.71	0.66	0.59	0.83	0.71
CADD	0.65	0.59	0.66	0.66	0.61	0.59	0.66	0.71	0.74	0.56	0.66	0.56	0.55	0.77	0.85	0.71	0.71	0.64	0.6	0.55	0.67	0.58	0.76
ClinPred	0.3	0.2	0.22	0.17	0.09	0.13	0.26	0.27	0.07	0.24	0.19	0.22	0.1	0.29	0.11	0.19	0.24	0	0.15	0.16	0.13	0.2	0.44
MetaSVM	0.26	0.16	0.14	0.12	0.08	0.07	0.16	0.16	0.06	0.22	0.11	0.18	0.04	0.28	0.09	0.17	0.18	0	0.13	0.13	0.11	0.14	0.44
GERP	0.03	0.04	0.04	0.03	0.03	0.04	0.03	0.03	0.04	0.04	0.05	0.05	0.05	0.03	0.06	0.04	0.05	0.02	0.03	0.03	0.04	0.06	0.07
spliceai	0.53	0.53	0.57	0.57	0.62	0.61	0.57	0.6	0.61	0.51	0.53	0.49	0.61	0.63	0.64	0.63	0.5	0.71	0.48	0.69	0.75	0.4	0.53
Revel	0	0	0	0	0	0	0	0	0	0	0.05	0	0	0	0	0	0	0	0	0	0	0	0
Alphamissense	0.26	0.19	0.11	0.12	0.1	0.1	0.22	0.18	0.05	0.16	0.13	0.2	0.09	0.28	0.09	0.16	0.17	0	0.13	0.17	0.11	0.07	0.41
											missense
	chr1	chr2	chr3	chr4	chr5	chr6	chr7	chr8	chr9	chr10	chr11	chr12	chr13	chr14	chr15	chr16	chr17	chr18	chr19	chr20	chr21	chr22	chrX
DITTO	0.85	0.79	0.9	0.84	0.64	0.78	0.63	0.75	0.78	0.85	0.9	0.88	0.83	0.82	0.92	0.82	0.88	0.74	0.86	0.9	0.81	0.77	0.87
CADD	0.66	0.6	0.74	0.62	0.46	0.35	0.48	0.62	0.57	0.64	0.74	0.59	0.72	0.61	0.7	0.63	0.66	0.53	0.74	0.7	0.58	0.48	0.74
ClinPred	0.81	0.74	0.9	0.85	0.59	0.75	0.56	0.72	0.72	0.84	0.9	0.84	0.83	0.81	0.92	0.78	0.85	0.67	0.83	0.9	0.77	0.69	0.85
MetaSVM	0.82	0.76	0.84	0.75	0.69	0.72	0.78	0.67	0.64	0.75	0.81	0.76	0.83	0.86	0.9	0.68	0.79	0.77	0.81	0.89	0.85	0.68	0.84
GERP	0.44	0.45	0.53	0.36	0.3	0.36	0.34	0.28	0.35	0.39	0.5	0.44	0.5	0.38	0.46	0.42	0.45	0.33	0.35	0.45	0.44	0.33	0.56
spliceai	0.04	0.06	0.04	0.08	0.08	0.05	0.08	0.11	0.1	0.07	0.07	0.1	0.06	0.06	0.02	0.05	0.09	0.07	0.05	0.03	0.03	0.05	0.06
Revel	0.82	0.73	0.81	0.76	0.64	0.72	0.62	0.65	0.71	0.8	0.83	0.78	0.8	0.82	0.84	0.65	0.75	0.6	0.68	0.84	0.78	0.73	0.73
Alphamissense	0.79	0.8	0.87	0.77	0.73	0.73	0.76	0.7	0.81	0.83	0.84	0.83	0.86	0.8	0.88	0.76	0.83	0.69	0.78	0.89	0.8	0.55	0.83
											splice site
	chr1	chr2	chr3	chr4	chr5	chr6	chr7	chr8	chr9	chr10	chr11	chr12	chr13	chr14	chr15	chr16	chr17	chr18	chr19	chr20	chr21	chr22	chrX
DITTO	0.99	0.99	0.99	0.99	0.99	0.99	0.99	0.99	0.99	0.99	0.99	0.99	1	0.99	0.99	0.98	0.99	1	0.98	0.99	1	0.98	0.99
CADD	0.99	0.99	1	0.98	0.99	0.99	0.99	0.99	1	0.97	0.99	0.99	0.95	0.98	0.97	0.98	0.99	1	0.99	0.95	0.91	0.99	0.99
ClinPred	0.99	0.99	0.99	0.99	0.99	0.99	0.98	0.99	0.99	0.99	0.99	0.99	0	0.98	0.99	0.01	0.99	0	0.98	0	0	0.98	0.99
MetaSVM	0	0	0.01	0	0.01	0.01	0.01	0	0.01	0.99	0.01	0.01	0	0.01	0	0.01	0	0	0	0	0	0	0.98
GERP	0.98	0.99	0.97	0.98	0.99	0.99	0.98	0.99	1	0.99	0.99	0.96	0.9	0.94	0.96	0.99	0.99	0.99	0.98	0.94	0.87	0.99	0.98
spliceai	0.97	0.98	0.98	0.99	0.98	0.98	0.97	0.99	0.98	0.99	0.98	0.99	0.99	0.97	0.98	0.97	0.98	0.98	0.97	0.99	0.98	0.97	0.97
Revel	0	0	0	0	0	0	0	0	0	0	0	0	0	0	0	0	0	0	0	0	0	0	0
Alphamissense	0	0.99	0	0	0	0	0	0	0	0	0	0	0	0.98	0	0	0	0	0	0	0	0	0
											3 prime UTR
	chr1	chr2	chr3	chr4	chr5	chr6	chr7	chr8	chr9	chr10	chr11	chr12	chr13	chr14	chr15	chr16	chr17	chr18	chr19	chr20	chr21	chr22	chrX
DITTO	0.89	0.94	0.9	0.87	0.85	0.91	0.89	0.87	0.93	0.8	0.83	0.9	0.9	0.88	0.93	0.88	0.91	0.78	0.79	0.98	0.92	0.94	0.44
CADD	0.68	0.74	0.79	0.91	0.78	0.64	0.77	0.79	0.82	0.71	0.65	0.61	0.81	0.67	0.8	0.49	0.73	0.8	0.7	0.76	0.57	0.67	0.38
ClinPred	0.4	0.53	0.46	0.19	0.58	0.49	0.35	0.32	0.59	0.67	0.61	0.33	0.57	0.52	0.39	0.58	0.4	0.12	0.33	0.6	0.44	0.27	0.48
MetaSVM	0.35	0.47	0.24	0.21	0.49	0.4	0.22	0.3	0.44	0.38	0.54	0.24	0.5	0.48	0.34	0.53	0.35	0.14	0.2	0.58	0.25	0.05	0.33
GERP	0.12	0.2	0.11	0.1	0.1	0.13	0.11	0.11	0.17	0.09	0.18	0.13	0.15	0.08	0.17	0.13	0.19	0.06	0.09	0.16	0.09	0.18	0.08
spliceai	0.11	0.03	0.06	0.04	0.03	0.06	0.12	0.04	0.12	0.11	0.05	0	0.24	0	0.07	0.13	0.07	0	0.17	0	0	0.05	0
Revel	0	0	0	0	0	0	0.04	0	0	0	0	0.13	0	0	0	0	0	0	0	0	0	0	0
Alphamissense	0.32	0.47	0.26	0.2	0.46	0.41	0.26	0.29	0.56	0.54	0.53	0.22	0.32	0.42	0.29	0.45	0.3	0.14	0.28	0.53	0.25	0.05	0.5
											5 prime UTR
	chr1	chr2	chr3	chr4	chr5	chr6	chr7	chr8	chr9	chr10	chr11	chr12	chr13	chr14	chr15	chr16	chr17	chr18	chr19	chr20	chr21	chr22	chrX
DITTO	0.82	0.74	0.69	0.7	0.38	0.76	0.55	0.76	0.97	0.62	0.61	0.43	0.57	0.71	0.62	0.84	0.91	1	0.63	0.83	0	0.8	0.57
CADD	0.34	0.56	0.32	0.4	0.24	0.17	0.29	0.6	0.44	0	0.48	0	0.43	0.43	0.8	0.84	0.47	0	0.35	0.77	0	0.46	0.55
ClinPred	0.35	0.33	0	0.22	0.4	0	0.2	0	0.4	0	0.35	0	0	0.2	0.17	0.42	0.17	0	0.4	0.14	0	0	0.61
MetaSVM	0.25	0.12	0	0.12	0.57	0.17	0.33	0	0.22	0	0.31	0	0	0.25	0.17	0.32	0.18	0	0.2	0.33	0	0.12	0.58
GERP	0.1	0.09	0.14	0.1	0.06	0.1	0.06	0.11	0.17	0.09	0.08	0.04	0.08	0.1	0.21	0.22	0.39	0	0.08	0.12	0	0.11	0.13
spliceai	0	0.56	0.17	0	0	0	0	0	0	0	0	0	0	0.29	0.18	0	0.06	0	0	0	0	0.8	0.25
Revel	0	0	0	0	0	0	0	0	0	0	0	0	0	0	0	0	0	0	0	0	0	0	0
Alphamissense	0.25	0	0	0	0.5	0	0.25	0	0.22	0	0.31	0	0	0.25	0.18	0.26	0.12	0	0.4	0.33	0	0	0.61
											frameshift truncation
	chr1	chr2	chr3	chr4	chr5	chr6	chr7	chr8	chr9	chr10	chr11	chr12	chr13	chr14	chr15	chr16	chr17	chr18	chr19	chr20	chr21	chr22	chrX
DITTO	0.99	0.99	0.99	0.99	1	0.99	0.99	0.99	0.99	0.99	0.99	0.99	1	1	0.99	1	0.99	0.99	0.99	0.99	0.99	1	0.99
CADD	0.99	0.99	0.99	0.99	0.02	0.99	0.99	0.99	0.99	0.99	0.99	0.99	0.03	1	0.99	0.01	0.99	0	0.98	0.01	0	1	0.01
ClinPred	0	0	0	0	0	0	0	0	0	0	0	0	0	0	0	0	0	0	0	0	0	0	0
MetaSVM	0	0	0	0	0	0	0	0	0	0	0	0	0	0	0	0	0	0	0	0	0	0	0
GERP	0.99	0.99	0.99	0.99	0.99	0.99	0.99	0.99	0.99	0.99	0.99	0.99	0.99	0.01	0.99	0.99	0.99	0	0.99	0.01	0	1	0.99
spliceai	0	0	0	0	0	0	0	0	0	0	0	0	0	0	0	0	0	0	0	0	0	0	0
Revel	0	0	0	0	0	0	0	0	0	0	0	0	0	0	0	0	0	0	0	0	0	0	0
Alphamissense	0	0	0	0	0	0	0	0	0	0	0	0	0	0	0	0	0	0	0	0	0	0	0
											Other RNA
	chr1	chr2	chr3	chr4	chr5	chr6	chr7	chr8	chr9	chr10	chr11	chr12	chr13	chr14	chr15	chr16	chr17	chr18	chr19	chr20	chr21	chr22	chrX
DITTO	0.84	0.92	0.84	0.84	0.77	0.83	0.72	0.8	0.82	0.74	0.75	0.75	0.77	0.9	0.89	0.88	0.86	0.93	0.85	0.79	0.82	0.84	0.67
CADD	0.69	0.52	0.71	0.76	0.69	0.75	0.75	0.76	0.71	0.75	0.75	0.56	0.64	0.74	0.77	0.8	0.69	0.76	0.74	0.61	0.7	0.74	0.64
ClinPred	0.39	0.35	0.38	0.45	0.26	0.21	0.39	0.27	0.34	0.37	0.43	0.55	0.41	0.45	0.42	0.3	0.41	0.56	0.43	0.44	0.44	0.26	0.69
MetaSVM	0.33	0.31	0.33	0.33	0.24	0.1	0.39	0.16	0.27	0.33	0.3	0.4	0.42	0.29	0.34	0.22	0.33	0.48	0.31	0.43	0.34	0.16	0.6
GERP	0.08	0.12	0.12	0.08	0.08	0.1	0.09	0.07	0.09	0.07	0.06	0.08	0.08	0.11	0.12	0.12	0.13	0.09	0.08	0.1	0.04	0.08	0.12
spliceai	0.3	0.29	0.24	0.27	0.4	0.32	0.33	0.45	0.34	0.43	0.37	0.2	0.12	0.24	0.38	0.37	0.27	0.32	0.29	0.28	0.36	0.33	0.22
Revel	0	0	0	0.08	0	0	0	0	0	0	0	0.08	0	0	0	0	0	0.09	0	0	0	0	0
Alphamissense	0.3	0.29	0.34	0.34	0.24	0.17	0.44	0.25	0.28	0.37	0.34	0.55	0.41	0.37	0.35	0.23	0.27	0.45	0.35	0.45	0.4	0.2	0.61
											Stop gained
	chr1	chr2	chr3	chr4	chr5	chr6	chr7	chr8	chr9	chr10	chr11	chr12	chr13	chr14	chr15	chr16	chr17	chr18	chr19	chr20	chr21	chr22	chrX
DITTO	0.99	0.99	0.99	0.98	0.99	0.99	0.99	0.99	0.99	0.98	0.99	0.99	1	0.99	0.99	0.99	0.99	0.99	0.98	0.97	1	0.99	0.98
CADD	0.98	0.51	0.99	0.98	0.97	0.98	0.98	0.52	0.97	0.98	0.98	0.99	0.99	0.99	0.98	0.98	0.98	0.98	0.98	0.97	0.98	0.99	0.98
ClinPred	0.98	0.99	0.98	0.98	0.99	0.99	0.99	0.99	0.99	0.98	0.99	0.99	0.99	0.99	0.99	0.98	0.98	0.99	0.97	0.95	0.99	0.98	0.99
MetaSVM	0	0	0	0.01	0	0	0	0	0	0	0	0.99	0	0	0	0	0.98	0	0	0	0	0	0
GERP	0.95	0.97	0.96	0.97	0.97	0.97	0.97	0.96	0.97	0.95	0.98	0.97	0.96	0.95	0.96	0.96	0.97	0.96	0.94	0.93	0.96	0.95	0.97
spliceai	0.07	0.05	0.05	0.04	0.03	0.06	0.06	0.07	0.05	0.06	0.06	0.07	0.04	0.03	0.05	0.07	0.06	0.05	0.08	0.1	0.04	0.07	0.04
Revel	0	0	0	0	0	0	0	0	0	0	0	0	0	0	0	0	0	0	0	0	0	0	0
Alphamissense	0	0	0	0	0	0	0	0	0	0	0	0	0	0	0	0	0.98	0	0	0	0	0	0
											Synonymous
	chr1	chr2	chr3	chr4	chr5	chr6	chr7	chr8	chr9	chr10	chr11	chr12	chr13	chr14	chr15	chr16	chr17	chr18	chr19	chr20	chr21	chr22	chrX
DITTO	0.27	0.67	0.44	0.57	0.57	0.44	0.57	0.44	0.4	0.4	0.78	0.57	1	0.5	0.8	0.35	0.62	1	0.17	0	0	0.75	0.4
CADD	0.01	0.13	0.03	0.4	0.17	0.06	0.32	0.31	0.03	0	0.74	0.02	0.05	0.12	0.02	0.1	0.11	0.02	0.01	0	0	0.8	0.05
ClinPred	0	0.17	0	0	0	0.5	0	0	0	0	0.4	0	0	0.5	0	0	0.6	0	0	0	0	0	0
MetaSVM	0	0.18	0	0	0	0.4	0	0	0	0	0	0	0	0.5	0	0	0.6	0	0	0	0	0	0
GERP	0	0	0	0	0	0.18	0	0	0	0	0	0	0	0.33	0	0	0	0	0	0	0	0	0
spliceai	0.2	0.5	0.17	0.67	0.8	0.29	0.36	0.5	0.83	0.33	0.5	0.29	0.5	0.29	0.67	0.29	0.27	1	0.25	0	0	0.33	0.36
Revel	0	0	0	0	0	0	0	0	0	0	0	0	0	0	0	0	0	0	0	0	0	0	0
Alphamissense	0	0	0	0	0	0.5	0	0	0	0	0.25	0	0	0	0	0	0	0	0	0	0	0	0

## Sheet: Supp Table 6
Table S6: Number of NF1 LOVD variants reclassified by DITTO
original class	DITTO class	number of variants
B/LB	Likely Benign	202
B/LB	Likely Pathogenic	2
Conflicts	Likely Benign	116
Conflicts	Likely Pathogenic	84
Conflicts	Uncertain	7
P/LP	Likely Benign	4
P/LP	Likely Pathogenic	725
P/LP	Uncertain	4
Unknown	Likely Benign	294
Unknown	Likely Pathogenic	1589
Unknown	Uncertain	67
VUS	Likely Benign	242
VUS	Likely Pathogenic	333
VUS	Uncertain	90

## Sheet: Supp Table 7
Table S7: Example variants with different transcript impact and DITTO scores
TranscriptID	Gene	Consequence	Chr	Position	REF	ALT	DITTO
ENST00000580852	MIR4281	2kb_upstream_variant,miRNA	chr5	176629656	C	A	0.120741
ENST00000310112	SNCB	5_prime_UTR_variant	chr5	176629656	C	A	0.33163
ENST00000393693	SNCB	5_prime_UTR_variant	chr5	176629656	C	A	0.33163
ENST00000506696	SNCB	5_prime_UTR_variant	chr5	176629656	C	A	0.33163
ENST00000510387	SNCB	5_prime_UTR_variant	chr5	176629656	C	A	0.33163
ENST00000614675	SNCB	5_prime_UTR_variant	chr5	176629656	C	A	0.89147
ENST00000510473	EIF4E1B	2kb_upstream_variant,processed_transcript	chr5	176629656	C	A	0.93527
ENST00000647833	EIF4E1B	2kb_upstream_variant	chr5	176629656	C	A	0.997385
ENST00000318682	EIF4E1B	2kb_upstream_variant	chr5	176629656	C	A	0.997385
ENST00000506348	CDHR2	missense_variant	chr5	176584512	T	C	0.560447
ENST00000510636	CDHR2	missense_variant	chr5	176584512	T	C	0.790895
ENST00000261944	CDHR2	missense_variant	chr5	176584512	T	C	0.97077
ENST00000436713	MED8-AS1	2kb_upstream_variant,lnc_RNA	chr1	43384485	C	G	0.314313
ENST00000372457	MED8	3_prime_UTR_variant	chr1	43384485	C	G	0.919122
ENST00000372455	MED8	2kb_downstream_variant	chr1	43384485	C	G	0.99727
ENST00000290663	MED8	missense_variant	chr1	43384485	C	G	1
ENST00000641319	PPT1	missense_variant	chr1	40080486	G	C	0
ENST00000641471	PPT1	missense_variant	chr1	40080486	G	C	0
ENST00000642050	PPT1	missense_variant	chr1	40080486	G	C	0
ENST00000641924	PPT1	NMD_transcript_variant,synonymous_variant	chr1	40080486	G	C	5.36442e-07
ENST00000433473	PPT1	missense_variant	chr1	40080486	G	C	3.09944e-06
ENST00000530076	PPT1	5_prime_UTR_variant	chr1	40080486	G	C	3.6478e-05
ENST00000449045	PPT1	missense_variant	chr1	40080486	G	C	3.92795e-05
ENST00000372775	PPT1	2kb_upstream_variant,processed_transcript	chr1	40080486	G	C	0.000163794
ENST00000530704	PPT1	NMD_transcript_variant,3_prime_UTR_variant	chr1	40080486	G	C	0.00020355
ENST00000641691	PPT1	NMD_transcript_variant,3_prime_UTR_variant	chr1	40080486	G	C	0.00020355
ENST00000439754	PPT1	missense_variant	chr1	40080486	G	C	0.000461221
ENST00000372779	PPT1	NMD_transcript_variant,3_prime_UTR_variant	chr1	40080486	G	C	0.702876
ENST00000529905	PPT1	missense_variant,NMD_transcript_variant	chr1	40080486	G	C	0.914462
ENST00000207457	TEKT2	intron_variant	chr1	36085705	A	T	1.01328e-06
ENST00000469024	TEKT2	NMD_transcript_variant,stop_gained	chr1	36085705	A	T	0.999963
